# Supplementary material
Source: PubMed Central journal article supplement (PMC8299368)
Supplement: jamaotolaryngolheadnecksurg-e211383-s001.pdf [file jamaotolaryngolheadnecksurg-e211383-s001.pdf]

## Supplementary Online Content

Berges AJ, Lina IA, Ospino R, et al. Quantifying particle aerosolization risk during tracheostomy surgery and tracheostomy care. Published online July 22, 2021. *JAMA Otolaryngol Head Neck Surg*. doi:10.1001/jamaoto.2021.1383

**eTable 1.** Aerosolized Particle Spread During Suction and Nebulization

**eTable 2.** Particle Reduction With Tracheostomy Coverings Compared to Uncovered Tracheostomy

This supplementary material has been provided by the authors to give readers additional information about their work.

**eTable 1. Aerosolized Particle Spread During Suction and Nebulization**

| <b>Experimental Condition</b>   | <b>Mean ± SD Particle Concentration (counts/m<sup>3</sup>)</b> |
|---------------------------------|----------------------------------------------------------------|
| Suction                         | 7,300 ± 930*                                                   |
| Nebulization                    | 4,400 ± 350*                                                   |
| Nebulization with Surgical Mask | 410 ± 100*                                                     |
| Background Particle Measurement | 3,400 ± 780                                                    |

SD=standard deviation

\*denotes experimental particle concentration values which are calculated by subtracting the background particle concentration

**eTable 2. Particle Reduction With Tracheostomy Coverings Compared to Uncovered Tracheostomy**

| <b>Tracheostomy Covering</b> | <b>Mean <math>\pm</math> SD<br/>Particle Concentration<br/>(<i>counts/m<sup>3</sup></i>)*</b> | <b>% particle concentration<br/>compared to uncovered<br/>tracheostomy</b> |
|------------------------------|-----------------------------------------------------------------------------------------------|----------------------------------------------------------------------------|
| Uncovered Tracheostomy       | 4,995 $\pm$ 7500                                                                              | 100%                                                                       |
| Cotton Mask                  | 1,300 $\pm$ 70                                                                                | 26.2%                                                                      |
| Polyester Gaiter             | 1,000 $\pm$ 70                                                                                | 20.5%                                                                      |
| Humidification Mask          | 860 $\pm$ 70                                                                                  | 17.2%                                                                      |
| Surgical Mask                | 860 $\pm$ 70                                                                                  | 10.1%                                                                      |
| HME                          | 450 $\pm$ 60                                                                                  | 9.0%                                                                       |
| HME + Surgical Mask          | 100 $\pm$ 70                                                                                  | 2.1%                                                                       |

SD=standard deviation

HME= heat moisture exchanger

\*denotes experimental particle concentration values which are calculated by subtracting the background particle concentration
